# Supplementary material for: Tomato Brown Rugose Fruit Virus Can Be Transmissible through a Greenhouse Hydroponic System and Virus Inactivation Using a Cold Plasma Ozone Treatment
Source: Preprints.org preprint supplement (doi:10.20944/preprints202403.1283.v1), 2024-03-21
Supplement: Supplementary file 1 [file supplementary]

## Sheet: Supplementary Table 1
Supplementary Table S1. Preliminary screening results of ToBRFV in runoff water samples collected from three commercial greenhouses
	Water sample		Bioassay on tomato plantb
Greenhouse	Sample No.	qRT-PCRa	Symptom	ELISA (OD405nm)c
		Ct (dRn)a
Farm #1	V22-14	27.83 (+)	Yes	0.55 (+)
	V22-15	26.18 (+)	Yes	2.65 (+)
Farm #2	V22-19	25.54 (+)	No	0.01 (-)
	V22-20	30.16 (-)	No	0.01 (-)
	V22-21	29.64 (+)	No	0.01 (-)
	V22-22	28.52 (+)	No	0.01 (-)
	V22-23	26.13 (+)	No	0.01 (-)
	V22-24	25.59 (+)	No	0.03 (-)
	V22-25	26.71 (+)	No	0.01 (-)
	V22-26	24.64 (+)	No	0.01 (-)
	V22-27	24.22 (+)	No	0.03 (-)
	V22-28	26.33 (+)	No	0.01 (-)
	V22-29	19.90 (+)	Yes	2.56 (+)
	V22-30	24.42 (+)	No	0.01 (-)
	V22-31	25.07 (+)	No	0.01 (-)
	V22-32	26.41 (+)	No	0.01 (-)
	V22-33	23.85 (+)	No	0.01 (-)
	V22-34	21.25 (+)	No	0.01 (-)
	V22-35	24.50 (+)	No	0.01 (-)
	V22-36	23.83 (+)	No	0.01 (-)
	V22-37	22.65 (+)	No	0.01 (-)
	V22-38	22.86 (+)	No	0.01 (-)
	V22-39	22.74 (+)	No	0.01 (-)
	V22-40	23.52 (+)	No	0.01 (-)
	V22-41	24.82 (+)	No	0.01 (-)
	V22-42	23.22 (+)	No	0.01 (-)
	V22-43	22.97 (+)	Yes	2.35 (+)
	V22-44	31.10 (-)	No	0.01 (-)
	V22-45	25.19 (+)	No	0.01 (-)
	V22-46	28.48 (+)	No	0.01 (-)
	V22-47	Not detected (-)	No	0.01 (-)
	V22-48	28.25 (+)	No	0.01 (-)
	V22-49	27.79 (+)	No	0.01 (-)
	V22-50	27.16 (+)	No	0.01 (-)
	V22-51	26.42 (+)	No	0.01 (-)
	V22-52	27.00 (+)	No	0.01 (-)
	V22-53	27.90 (+)	No	0.03 (-)
Farm #3	V22-62	31.75 (-)	No	0.01 (-)
	V22-63	32.03 (-)	No	0.01 (-)
	V22-64	31.31 (-)	No	0.01 (-)
	V22-65	28.92 (+)	No	0.01 (-)
	V22-66	30.89 (-)	No	0.01 (-)
	V22-67	29.54 (+)	No	0.01 (-)
	V22-68	31.84 (-)	No	0.01 (-)
	V22-69	30.29 (-)	No	0.01 (-)
	V22-70	31.54 (-)	No	0.03 (-)
	V22-71	31.66 (-)	No	0.01 (-)
	V22-72	31.73 (-)	No	0.01 (-)
	V22-73	31.97 (-)	No	0.01 (-)
	V22-74	30.16 (-)	No	0.01 (-)
	V22-75	28.66 (+)	No	0.01 (-)
	V22-76	32.13 (-)	No	0.01 (-)
	V22-77	31.93 (-)	No	0.01 (-)
	V22-78	31.41 (-)	No	0.01 (-)
	V22-79	27.03 (+)	No	0.01 (-)
	V22-80	31.24 (-)	No	0.03 (-)
	V22-81	32.40 (-)	No	0.01 (-)
	V22-82	30.20 (-)	No	0.01 (-)
	V22-83	30.13 (-)	No	0.01 (-)
	V22-84	31.87 (-)	No	0.01 (-)
	V22-85	29.87 (+)	No	0.03 (-)
	V22-86	31.89 (-)	No	0.01 (-)
	V22-87	30.16 (-)	No	0.01 (-)
	V22-88	31.70 (-)	No	0.01 (-)
	V22-89	30.97 (-)	No	0.01 (-)
	V22-90	31.69 (-)	No	0.04 (+)
	V22-91	30.67 (-)	No	0.01 (-)
	V22-92	28.87 (+)	No	0.01 (-)
	V22-94	26.60 (+)	No	0.01 (-)
	V22-95	26.56 (+)	No	0.01 (-)
	V22-96	22.91 (+)	No	0.01 (-)
	V22-97	31.32 (-)	No	0.01 (-)
	V22-98	27.59 (+)	No	0.01 (-)
	V22-99	27.30 (+)	No	0.01 (-)
	V22-100	22.62 (+)	No	0.01 (-)
	V22-101	24.66 (+)	No	0.01 (-)
	V22-102	24.06 (+)	No	0.01 (-)
	V22-103	25.18 (+)	No	0.01 (-)
	V22-104	29.79 (+)	No	0.01 (-)
	V22-105	30.31 (-)	No	0.01 (-)
	V22-106	25.45 (+)	No	0.01 (-)
	V22-107	27.69 (+)	No	0.01 (-)
	V22-108	30.79 (-)	No	0.01 (-)
	V22-109	29.93 (+)	No	0.01 (-)
	V22-110	28.41 (+)	No	0.01 (-)
	V22-111	30.24 (-)	No	0.01 (-)
	V22-112	29.09 (+)	No	0.01 (-)
	V22-113	27.96 (+)	No	0.01 (-)
	V22-114	30.60 (-)	No	0.01 (-)
	V22-115	29.52 (+)	No	0.01 (-)
	V22-116	30.09 (-)	No	0.01 (-)
	V22-117	29.47 (+)	No	0.01 (-)
	V22-118	30.88 (-)	No	0.01 (-)
	V22-119	31.25 (-)	No	0.01 (-)
	V22-120	28.30 (+)	No	0.01 (-)
	V22-121	28.55 (+)	No	0.01 (-)
	V22-122	28.68 (+)	No	0.01 (-)
	V22-123	28.92 (+)	No	0.01 (-)
	V22-124	27.99 (+)	No	0.01 (-)
	V22-125	28.50 (+)	No	0.01 (-)
	V22-126	27.64 (+)	No	0.01 (-)
	V22-127	28.48 (+)	No	0.01 (-)
	V22-128	31.20 (-)	No	0.01 (-)
	V22-129	31.03 (-)	No	0.01 (-)
	V22-130	31.40 (-)	No	0.01 (-)
	V22-131	30.91 (-)	No	0.01 (-)
	V22-132	30.95 (-)	No	0.01 (-)
	V22-133	30.94 (-)	No	0.01 (-)
	V22-134	31.10 (-)	No	0.01 (-)
	V22-135	25.25 (+)	No	0.01 (-)
	V22-136	30.46 (-)	No	0.01 (-)
	V22-137	30.65 (-)	No	0.01 (-)
	V22-138	30.36 (-)	No	0.01 (-)
	V22-139	30.76 (-)	No	0.01 (-)
	V22-140	30.53 (-)	No	0.01 (-)
	V22-141	30.01 (-)	No	0.01 (-)
	V22-142	30.62 (-)	No	0.01 (-)
	V22-143	30.09 (-)	No	0.01 (-)
	V22-144	28.22 (+)	No	0.01 (-)
	V22-145	27.46 (+)	No	0.01 (-)
	V22-146	27.14 (+)	No	0.01 (-)
	V22-147	27.16 (+)	No	0.01 (-)
	V22-148	28.62 (+)	No	0.01 (-)
	V22-149	28.24 (+)	No	0.01 (-)
	V22-150	27.49 (+)	No	0.01 (-)
	V22-151	26.52 (+)	No	0.01 (-)
	V22-152	29.94 (+)	No	0.01 (-)
	V22-153	30.14 (-)	No	0.01 (-)
	V22-154	29.83 (+)	No	0.01 (-)
	V22-155	29.90 (+)	No	0.01 (-)
	V22-156	29.97 (+)	No	0.01 (-)
	V22-157	29.35 (+)	No	0.01 (-)
	V22-158	29.96 (+)	No	0.01 (-)
	V22-159	29.79 (+)	No	0.01 (-)
Positive control	ToBRFV-tomato	13.43 (+)	Yes	2.67 (+)
Negative control	Healthy tomato	31.22 (-)	No	0.01 (-)
a Runoff water samples collected from three commercial greenhouses were used directly as templates for qRT-PCR. The Ct cut-off value was 30 in this qRT-PCR test. Those water samples with a Ct (dRn) reading < 30 were considered positive (+) for ToBRFV, those >30 were negative (-).
b Bioassay was conducted by mechanical inoculation of a tomato seedling using each runoff water sample collected from three commercial greenhouses for symptom expression at 4 or 8 weeks post inoculation, followed by a confirmation test for ToBRFV using ELISA.
c The ELISA absorbent value at OD405 nm > 0.3 was considered positive (+), those ≤ 0.3 was negative (-).
